# Supplementary material
Source: PubMed Central journal article supplement (PMC6414392)
Supplement: AEM.02446-18-s0001.pdf [file AEM.02446-18-s0001.pdf]

A

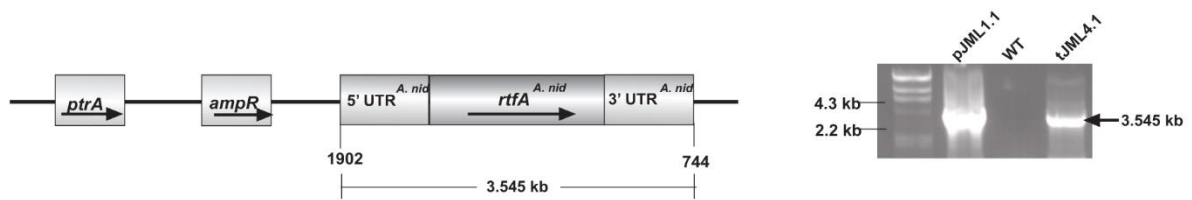

B

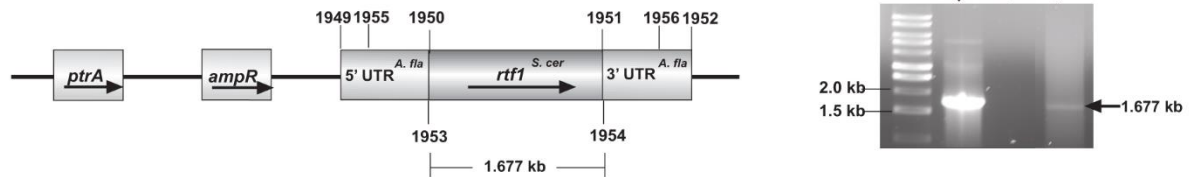

**Figure S2. Confirmation of *rtfA* heterologous complementation strains.** (A) Linear representation of *A. nidulans* heterologous complementation vector pJML1.1. Confirmation of integration of *A. nidulans* *rtfA* gene into the genome of the *A. flavus*  $\Delta$ *rtfA* strain was carried out by diagnostic PCR using primers 1902 and 744, obtaining the expected 3.545 kb product. (B) Linear representation of *S. cerevisiae* heterologous complementation vector pJML1.2. Confirmation of integration of *S. cerevisiae* *rtf1* gene into the genome of the *A. flavus*  $\Delta$ *rtfA* strain was carried out by diagnostic PCR using primers 1953 and 1954, obtaining the expected 1.577 kb product.

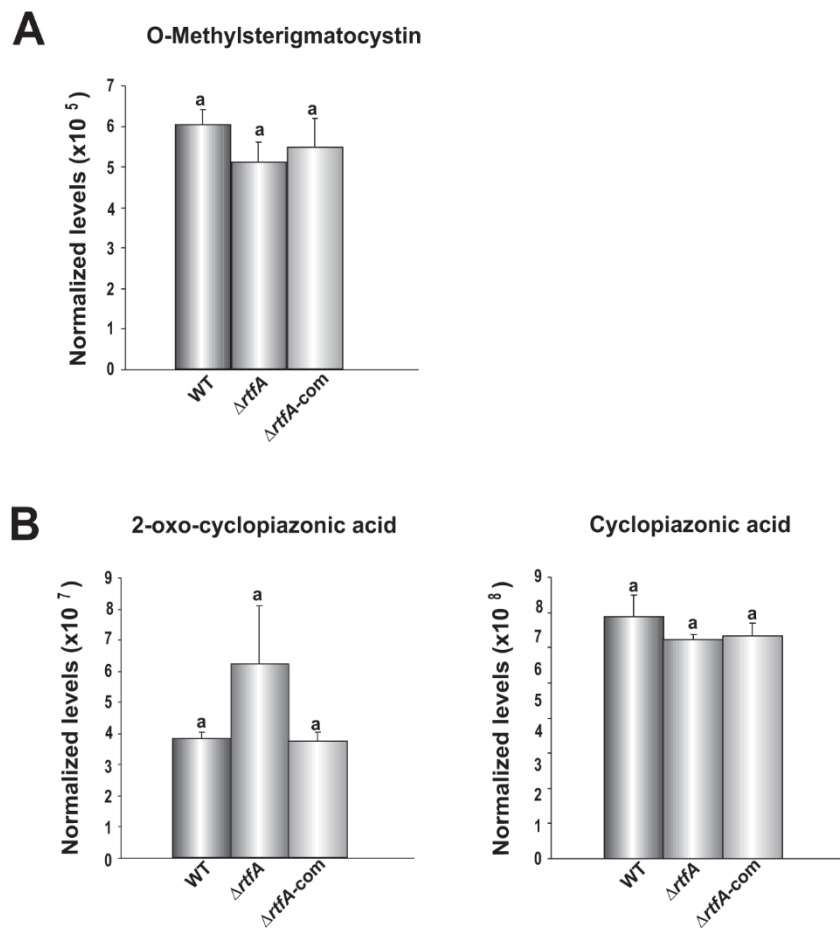

**Figure S3. *rtfA* does not affect the production of O-methylsterigmatocystin and metabolites of the CPA biosynthetic pathway.** *A. flavus* wild type (WT),  $\Delta rtfA$ , and  $\Delta rtfA$ -com strains were grown in YGT medium for 5 days at 30°C in the dark. Compounds in the culture supernatants were analyzed by LC-MS. (A) Analysis of O-methylsterigmatocystin. (B) Analysis of metabolites in the CPA pathway. Error bars represent standard error. Columns with different letters represent values that are statistically different ( $p < 0.050$ ).

**Table S1: *rtfA* putative homologs and amino acid sequence accession numbers utilized in the bioinformatic analysis**

| Species                         | Accession Number | Emboss Needle-Pairwise Sequence Alignment<br>(global alignment) |            |              |
|---------------------------------|------------------|-----------------------------------------------------------------|------------|--------------|
|                                 |                  | Length                                                          | % Identity | % Similarity |
| <i>Aspergillus flavus</i>       | XP_002377748.1   | 628                                                             | 100.0      | 100.0        |
| <i>Aspergillus nidulans</i>     | XP_662174.1      | 600                                                             | 70.4       | 82.1         |
| <i>Saccharomyces cerevisiae</i> | NP_011270.1      | 558                                                             | 25.0       | 44.0         |
| <i>Arabidopsis thaliana</i>     | NP_176299.1      | 643                                                             | 21.3       | 37.7         |
| <i>Homo sapiens</i>             | NP_055953.3      | 670                                                             | 20.8       | 37.9         |
| <i>Xenopus tropicalis</i>       | NP_001005068.1   | 590                                                             | 19.5       | 37.4         |
| <i>Danio rerio</i>              | NP_001077046.1   | 681                                                             | 21.5       | 36.7         |
| <i>Drosophila melanogaster</i>  | NP_611665.1      | 775                                                             | 19.5       | 33.9         |
| <i>Caenorhabditis elegans</i>   | NP_505473        | 613                                                             | 20.1       | 36.1         |
